# Supplementary material for: Enhanced isolation of influenza viruses in qualified cells improves the probability of well-matched vaccines
Source: PubMed Central journal article supplement (PMC8660794; doi:10.1038/s41541-021-00415-3), 2021-12-09
Supplement: 41541_2021_415_MOESM1_ESM.pdf [file 41541_2021_415_MOESM1_ESM.pdf]

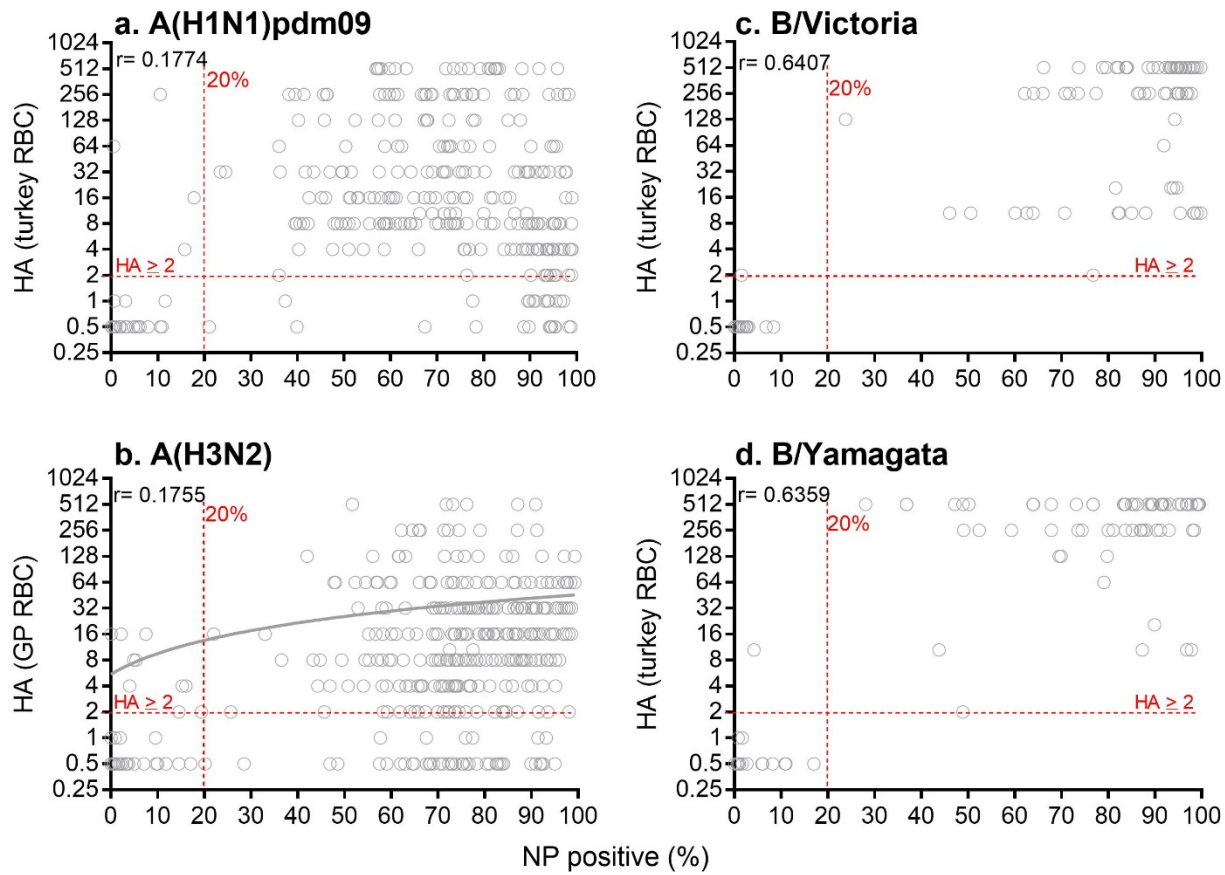

**Supplementary Figure 2.** The correlation between proportion NP-positive (%) by flow cytometry and HA titre was plotted for cell-grown virus isolates, by subtype/lineage. The horizontal dotted line indicates a HA of at least 2 and the vertical dotted line indicates 20% positivity by flow cytometry.

**Supplementary Table 1.** Isolation rates in cells and eggs by year and subtype/lineage.

| year | A(H1N1)    |             |     |            |             |     | A(H3N2)    |             |     |            |             |    | B/Victoria |             |     |            |             |     | B/Yamagata |             |     |            |             |     |
|------|------------|-------------|-----|------------|-------------|-----|------------|-------------|-----|------------|-------------|----|------------|-------------|-----|------------|-------------|-----|------------|-------------|-----|------------|-------------|-----|
|      | cells      |             |     | eggs       |             |     | cells      |             |     | eggs       |             |    | cells      |             |     | eggs       |             |     | cells      |             |     | eggs       |             |     |
|      | # positive | # attempted | %   | # positive | # attempted | %   | # positive | # attempted | %   | # positive | # attempted | %  | # positive | # attempted | %   | # positive | # attempted | %   | # positive | # attempted | %   | # positive | # attempted | %   |
| 2008 | 0          | 0           | n/a | 0          | 0           | n/a | 7          | 7           | 100 | 6          | 7           | 86 | 15         | 22          | 68  | 3          | 15          | 20  | 22         | 29          | 76  | 2          | 4           | 50  |
| 2009 | 20         | 23          | 87  | 17         | 23          | 74  | 19         | 21          | 90  | 14         | 18          | 78 | 0          | 0           | n/a | 0          | 0           | n/a | 0          | 0           | n/a | 0          | 0           | n/a |
| 2010 | 23         | 35          | 66  | 11         | 19          | 58  | 21         | 23          | 91  | 8          | 16          | 50 | 8          | 8           | 100 | 7          | 8           | 88  | 3          | 5           | 60  | 0          | 1           | 0   |
| 2011 | 16         | 33          | 48  | 9          | 26          | 35  | 28         | 38          | 74  | 4          | 31          | 13 | 9          | 12          | 75  | 1          | 6           | 17  | 3          | 3           | 100 | 2          | 5           | 40  |
| 2012 | 18         | 19          | 95  | 4          | 19          | 21  | 35         | 38          | 92  | 10         | 38          | 26 | 17         | 21          | 81  | 6          | 19          | 32  | 21         | 26          | 81  | 3          | 23          | 13  |
| 2013 | 43         | 54          | 80  | 17         | 51          | 33  | 36         | 47          | 77  | 19         | 47          | 40 | 5          | 6           | 83  | 1          | 6           | 17  | 10         | 14          | 71  | 5          | 14          | 36  |
| 2014 | 14         | 20          | 70  | 10         | 20          | 50  | 62         | 83          | 75  | 23         | 83          | 28 | 8          | 11          | 73  | 2          | 11          | 18  | 14         | 16          | 88  | 5          | 16          | 31  |
| 2015 | 41         | 49          | 84  | 18         | 49          | 37  | 39         | 42          | 93  | 19         | 42          | 45 | 16         | 21          | 76  | 6          | 21          | 29  | 0          | 0           | n/a | 0          | 0           | n/a |
| 2016 | 36         | 43          | 84  | 12         | 23          | 52  | 61         | 68          | 90  | 15         | 61          | 25 | 12         | 16          | 75  | 4          | 5           | 80  | 8          | 9           | 89  | 4          | 5           | 80  |
| 2017 | 40         | 48          | 83  | 6          | 8           | 75  | 49         | 56          | 88  | 21         | 56          | 38 | 0          | 0           | n/a | 0          | 0           | n/a | 0          | 0           | n/a | 0          | 0           | n/a |
| 2018 | 41         | 44          | 93  | 17         | 17          | 100 | 44         | 50          | 88  | 17         | 22          | 77 | 1          | 5           | 20  | 3          | 5           | 60  | 0          | 0           | n/a | 0          | 0           | n/a |
| 2019 | 31         | 48          | 65  | 4          | 4           | 100 | 45         | 72          | 63  | 13         | 27          | 48 | 12         | 20          | 60  | 5          | 6           | 83  | 5          | 5           | 100 | 3          | 4           | 75  |
| 2020 | 11         | 18          | 61  | 2          | 2           | 100 | 16         | 32          | 50  | 4          | 11          | 36 | 5          | 5           | 100 | 1          | 1           | 100 | 0          | 0           | n/a | 0          | 0           | n/a |

**Supplementary Table 2.** Amino acid mutations in HA and NA proteins of viruses following passage in eggs or cells. Only viruses with mutation in the HA protein are listed.

| Changes in HA and NA proteins (aa) after cell and egg passage |                       |                     |                  |                       |                           |                          |         |
|---------------------------------------------------------------|-----------------------|---------------------|------------------|-----------------------|---------------------------|--------------------------|---------|
| Subtype/lineage                                               | Virus                 | MDCK passage        |                  |                       | egg passage               |                          |         |
|                                                               |                       | HA <sup>a</sup>     | NA <sup>a</sup>  | passage               | HA <sup>a</sup>           | NA <sup>a</sup>          | passage |
| A(H1N1)                                                       | A/NEWCASTLE/7/2013    | -                   | - <sup>b</sup>   | P2                    | Q223R                     | -                        | E4      |
| A(H1N1)                                                       | A/CHRISTCHURCH/6/2014 | -                   | - <sup>b</sup>   | P2                    | S164X, S183P, Q223X       | -                        | E3      |
| A(H1N1)                                                       | A/FIJI/2/2016         | -                   | N270K            | P2                    | Q223R                     | N270K                    | E3      |
| A(H1N1)                                                       | A/FIJI/3/2016         | -                   | -                | P2                    | Q223R                     | -                        | E3      |
| A(H1N1)                                                       | A/FIJI/8/2016         | -                   | -                | P2                    | L191I                     | -                        | E3      |
| A(H1N1)                                                       | A/VICTORIA/900/2016   | -                   | - <sup>b</sup>   | P2                    | L191X, Q223X              | -                        | E3      |
| A(H1N1)                                                       | A/DARWIN/20/2015      | -                   | - <sup>b</sup>   | P2                    | L191X, D222X              | S37X <sup>b</sup>        | E3      |
| A(H1N1)                                                       | A/FIJI/17/2015        | -                   | - <sup>b</sup>   | P2                    | K43X, L191I               | -                        | E3      |
| A(H1N1)                                                       | A/BRISBANE/10/2010    | -                   | - <sup>b</sup>   | P2 (P3 <sup>e</sup> ) | D127E                     | -                        | E2      |
| A(H1N1)                                                       | A/DARWIN/2126/2009    | -                   | - <sup>b</sup>   | P2 (P3 <sup>e</sup> ) | S183P                     | D248X <sup>b</sup>       | E2      |
| A(H1N1)                                                       | A/VICTORIA/528/2009   | -                   | - <sup>b</sup>   | P2 (P3 <sup>e</sup> ) | V30G, L191I               | S12L                     | E3      |
| A(H1N1)                                                       | A/VICTORIA/2083/2009  | -                   | - <sup>b</sup>   | P2 (P3 <sup>e</sup> ) | L191I                     | S12L, D248N <sup>b</sup> | E2      |
| A(H1N1)                                                       | A/DARWIN/2131/2009    | -                   | -                | P2                    | E21K, G225A               | -                        | E2      |
| A(H1N1)                                                       | A/GUAM/2050/2009      | -                   | - <sup>b</sup>   | P2                    | N10Y, Q223R               | -                        | E2      |
| A(H1N1)                                                       | A/VICTORIA/523/2012   | -                   | - <sup>b</sup>   | P2                    | R45E, D127E, S183X, G225X | I188X <sup>b</sup>       | E5      |
| A(H1N1)                                                       | A/DARWIN/70/2011      | T82X                | n/a <sup>c</sup> | P2                    | L191X                     | n/a <sup>c</sup>         | E3      |
| A(H1N1)                                                       | A/WELLINGTON/1/2011   | -                   | n/a <sup>c</sup> | P2                    | Q223R                     | n/a <sup>c</sup>         | E3      |
| A(H1N1)                                                       | A/BRISBANE/190/2011   | -                   | n/a <sup>c</sup> | P2                    | Q223R                     | n/a <sup>c</sup>         | E3      |
| A(H1N1)                                                       | A/MALAYSIA/478/2011   | X131G, X155E, X183P | n/a <sup>c</sup> | P2                    | X131G, X155E, X183P       | n/a <sup>c</sup>         | E2      |

|         |                            |                 |                  |    |                               |                   |    |
|---------|----------------------------|-----------------|------------------|----|-------------------------------|-------------------|----|
| A(H1N1) | A/MALAYSIA/517/2011        | X385R,<br>X509M | n/a <sup>c</sup> | P2 | D222G, X385K, X509M           | n/a <sup>c</sup>  | E3 |
| A(H1N1) | A/PERTH/533/2011           | -               | n/a <sup>c</sup> | P2 | Q223R                         | n/a <sup>c</sup>  | E3 |
| A(H1N1) | A/WELLINGTON/1/2010        | -               | n/a <sup>c</sup> | P2 | S183P                         | n/a <sup>c</sup>  | E2 |
| A(H1N1) | A/WELLINGTON/4/2010        | -               | n/a <sup>c</sup> | P2 | L191I                         | n/a <sup>c</sup>  | E2 |
| A(H1N1) | A/GUAM/2/2010              | -               | n/a <sup>c</sup> | P2 | S183P                         | n/a <sup>c</sup>  | E2 |
| A(H1N1) | A/TOWNSVILLE/121/2011      | T197X           | n/a <sup>c</sup> | P2 | not done <sup>d</sup>         | n/a <sup>c</sup>  |    |
| A(H1N1) | A/VICTORIA/528/2012        | L191X           | n/a <sup>c</sup> | P2 | not done <sup>d</sup>         | n/a <sup>c</sup>  |    |
| A(H1N1) | A/VICTORIA/24/2012         | S183X           | n/a <sup>c</sup> | P2 | not done <sup>d</sup>         | n/a <sup>c</sup>  |    |
| A(H1N1) | A/WELLINGTON/2/2012        | L191X           | n/a <sup>c</sup> | P2 | not done <sup>d</sup>         | n/a <sup>c</sup>  |    |
| A(H3N2) | A/PORT MORESBY/2/2009      | -               | n/a <sup>c</sup> | P2 | Y161S, G186V, N498S           | n/a <sup>c</sup>  | E3 |
| A(H3N2) | A/TOWNSVILLE/87/2010       | -               | _ <sup>b</sup>   | P2 | I140M, L194P                  | _ <sup>b</sup>    | E3 |
| A(H3N2) | A/CHRISTCHURCH/28/2011     | -               | _ <sup>b</sup>   | P2 | G186V, S219Y                  | _ <sup>b</sup>    | E5 |
| A(H3N2) | A/VICTORIA/362/2011        | -               | _ <sup>b</sup>   | P2 | H183X                         | _ <sup>b</sup>    | E3 |
| A(H3N2) | A/CHRISTCHURCH/512/2012    | -               | _ <sup>b</sup>   | P2 | G186V, N246H                  | V50M <sup>b</sup> | E6 |
| A(H3N2) | A/BRISBANE/198/2013        | -               | _ <sup>b</sup>   | P2 | L194P                         | _ <sup>b</sup>    | E4 |
| A(H3N2) | A/PERTH/239/2013           | -               | _ <sup>b</sup>   | P2 | L194P, T203I                  | _ <sup>b</sup>    | E4 |
| A(H3N2) | A/PERTH/98/2013            | -               | _ <sup>b</sup>   | P2 | G186V, S219X                  | _ <sup>b</sup>    | E4 |
| A(H3N2) | A/VICTORIA/710/2013        | -               | _ <sup>b</sup>   | P2 | S145N, L194P                  | _ <sup>b</sup>    | E5 |
| A(H3N2) | A/BRISBANE/341/2014        | -               | _ <sup>b</sup>   | P2 | T160K, L194P, T203I           | _ <sup>b</sup>    | E4 |
| A(H3N2) | A/BRISBANE/71/2015         | X338F, X366D    | _ <sup>b</sup>   | P2 | T160K, L194P, X338F,<br>X366D | _ <sup>b</sup>    | E5 |
| A(H3N2) | A/FIJI/2/2015              | -               | _ <sup>b</sup>   | P2 | T160K, L194P, D225G           | _ <sup>b</sup>    | E5 |
| A(H3N2) | A/FIJI/4/2015              | -               | _ <sup>b</sup>   | P2 | T160K, L194P, D225G,<br>S262N | _ <sup>b</sup>    | E5 |
| A(H3N2) | A/FIJI/7/2015              | -               | _ <sup>b</sup>   | P2 | T160K, L194P                  | C53F <sup>b</sup> | E5 |
| A(H3N2) | A/NEW<br>CALEDONIA/71/2014 | -               | _ <sup>b</sup>   | P2 | T160K, L194P, D225G           | _ <sup>b</sup>    | E5 |

|            |                           |                     |                  |    |                            |                  |    |
|------------|---------------------------|---------------------|------------------|----|----------------------------|------------------|----|
| A(H3N2)    | A/SOUTH AUSTRALIA/21/2015 | -                   | _ <sup>b</sup>   | P2 | T160K, L194P, T203X        | _ <sup>b</sup>   | E4 |
| A(H3N2)    | A/SOUTH AUSTRALIA/9/2015  | -                   | _ <sup>b</sup>   | P2 | I140X, T160K, L194P        | _ <sup>b</sup>   | E5 |
| A(H3N2)    | A/VICTORIA/5006/2014      | T160X               | _ <sup>b</sup>   | P2 | Y94X, T160K, L194P         | _ <sup>b</sup>   | E4 |
| A(H3N2)    | A/VICTORIA/6001/2015      | -                   | _ <sup>b</sup>   | P2 | G186V, S219X, T248X, A372S | _ <sup>b</sup>   | E4 |
| A(H3N2)    | A/VICTORIA/673/2014       | -                   | _ <sup>b</sup>   | P2 | N96S, T160K, L194P         | _ <sup>b</sup>   | E4 |
| A(H3N2)    | A/VICTORIA/505/2013       | -                   | _ <sup>b</sup>   | P2 | G186V, S219F               | _ <sup>b</sup>   | E4 |
| A(H3N2)    | A/SOUTH AUSTRALIA/24/2014 | -                   | _ <sup>b</sup>   | P2 | H156R, D225G               | _ <sup>b</sup>   | E4 |
| A(H3N2)    | A/SOUTH AUSTRALIA/40/2014 | -                   | _ <sup>b</sup>   | P2 | G186V, N246H               | _ <sup>b</sup>   | E3 |
| A(H3N2)    | A/SOUTH AUSTRALIA/55/2014 | E62X                | _ <sup>b</sup>   | P2 | S145N, D225G               | _ <sup>b</sup>   | E5 |
| A(H3N2)    | A/NEWCASTLE/25/2014       | -                   | _ <sup>b</sup>   | P2 | G186V, S219X, N246X        | _ <sup>b</sup>   | E3 |
| A(H3N2)    | A/VICTORIA/511/2015       | -                   | _ <sup>b</sup>   | P2 | I140K, H156Q, G186X, S219F | _ <sup>b</sup>   | E3 |
| A(H3N2)    | A/TOWNSVILLE/101/2010     | P11A                | n/a <sup>c</sup> | P2 | not done <sup>d</sup>      | n/a <sup>c</sup> |    |
| A(H3N2)    | A/NEWCASTLE/55/2010       | C473R               | n/a <sup>c</sup> | P2 | not done <sup>d</sup>      | n/a <sup>c</sup> |    |
| A(H3N2)    | A/SINGAPORE/13/2011       | A212S, N225D, S497N | n/a <sup>c</sup> | P2 | not done <sup>d</sup>      | n/a <sup>c</sup> |    |
| A(H3N2)    | A/PERTH/39/2015           | T160K               | n/a <sup>c</sup> | P2 | not done <sup>d</sup>      | n/a <sup>c</sup> |    |
| A(H3N2)    | A/SOUTH AUSTRALIA/46/2014 | E62X                | n/a <sup>c</sup> | P2 | not done <sup>d</sup>      | n/a <sup>c</sup> |    |
| A(H3N2)    | A/SOUTH AUSTRALIA/49/2015 | R33Q, E62K, T160K   | n/a <sup>c</sup> | P2 | not done <sup>d</sup>      | n/a <sup>c</sup> |    |
| A(H3N2)    | A/AUCKLAND/20/2013        | N225D               | n/a <sup>c</sup> | P2 | not done <sup>d</sup>      | n/a <sup>c</sup> |    |
| B/Yamagata | B/HONG KONG/2205/2010     | -                   | n/a <sup>c</sup> | P2 | N196X                      | n/a <sup>c</sup> | E3 |
| B/Yamagata | B/VICTORIA/500/2011       | -                   | n/a <sup>c</sup> | P2 | N196D                      | n/a <sup>c</sup> | E2 |

|            |                           |            |                  |    |       |                  |    |
|------------|---------------------------|------------|------------------|----|-------|------------------|----|
| B/Yamagata | B/SOUTH AUSTRALIA/76/2013 | -          | _ <sup>b</sup>   | P2 | N196X | _ <sup>b</sup>   | E4 |
| B/Yamagata | B/DARWIN/20/2014          | -          | _ <sup>b</sup>   | P2 | N196D | _ <sup>b</sup>   | E3 |
| B/Yamagata | B/DARWIN/13/2014          | -          | _ <sup>b</sup>   | P2 | N196Y | _ <sup>b</sup>   | E3 |
| B/Victoria | B/VICTORIA/512/2010       | -          | n/a <sup>c</sup> | P2 | N197S | n/a <sup>c</sup> | E2 |
| B/Victoria | B/SYDNEY/508/2010         | -          | n/a <sup>c</sup> | P2 | N197S | n/a <sup>c</sup> | E2 |
| B/Victoria | B/BRISBANE/18/2013        | -          | _ <sup>b</sup>   | P2 | N197X | _ <sup>b</sup>   | E4 |
| B/Victoria | B/VICTORIA/18/2012        | -          | _ <sup>b</sup>   | P2 | N197S | _ <sup>b</sup>   | E4 |
| B/Victoria | B/SOUTH AUSTRALIA/36/2012 | -          | _ <sup>b</sup>   | P2 | T199S | _ <sup>b</sup>   | E3 |
| B/Victoria | B/SOUTH AUSTRALIA/81/2012 | -          | -                | P2 | T199A | -                | E4 |
| B/Victoria | B/VICTORIA/849/2015       | -          | _ <sup>b</sup>   | P2 | T199A | _ <sup>b</sup>   | E4 |
| B/Victoria | B/NEW CALEDONIA/6/2014    | E48X, D64X | _ <sup>b</sup>   | P2 | T199I | _ <sup>b</sup>   | E3 |

<sup>a</sup> changes as compared to OCS

<sup>b</sup> changes as compared to cell passage P2

<sup>c</sup> comparison not available as cell-grown and/or egg-grown virus NA protein sequence not available

<sup>d</sup> egg passage not performed

<sup>e</sup> P3 passage sequenced for NA protein
